# Supplementary material for: Novel Library of Selenocompounds as Kinase Modulators
Source: Molecules. 2011 Jul 27;16(8):6349–64. doi: 10.3390/molecules16086349 (PMC6264252; doi:10.3390/molecules16086349)
Supplement: Supplementary File 1 [file molecules-16-06349-s001.pdf]

**Table S1.** Kinase inhibition screening assay conditions.

| Kinase | Species | Reference compound | Cation | Buffer, pH   | Detergent    | ATP Km (μM) | Enzyme Concentration (μM) | Tested Compound Concentration (μM) | Peptide                                    |
|--------|---------|--------------------|--------|--------------|--------------|-------------|---------------------------|------------------------------------|--------------------------------------------|
| Abl    | Human   | Staurosporine      | Mg     | Hepes, 7.5   | Brij         | 14          | 0.7                       | 10                                 | FL-EAIYAAPFAKKK-CONH <sub>2</sub>          |
| AKT1   | Human   | Staurosporine      | Mg     | Hepes, 7.5   | Brij         | 19          | 1.1                       | 10                                 | FL-GRPRTSSFAEG-CONH <sub>2</sub>           |
| AurA   | Human   | Staurosporine      | Mg     | Hepes, 7.5   | Brij         | 25          | 4                         | 10                                 | FL-LRRASLG-CONH <sub>2</sub>               |
| CDK2   | Human   | Staurosporine      | Mg     | Hepes, 7.5   | Brij         | 36          | 1.2                       | 10                                 | FL-QSPKKG-CONH <sub>2</sub>                |
| CDK9   | Human   | Staurosporine      | Mg     | MOPS, 6.0    | CHAPS0       | 3           | 5                         | 10                                 | FITC-GSRTPMY                               |
| CK1α   | Human   | 5-iodotubercidin   | Mg     | Hepes, 7.5   | Brij         | 6.9         | 4.64                      | 3                                  | FL-KRRRALpSVASLPGL-CONH <sub>2</sub>       |
| CK2    | Human   | Staurosporine      | Mg     | Hepes, 7.5   | Brij         | 3.95        | 20                        | 3                                  | FL-RRRDDDSDDD-CONH <sub>2</sub>            |
| cKIT   | Human   | Staurosporine      | Mn     | Hepes, 7.5   | Brij         | 300         | 20                        | 10                                 | FL-EAIYAAPFAKKK-CONH <sub>2</sub>          |
| c-RAF  | Human   | SB203580           | Mn     | Hepes, 7.5   | Brij         | 6.2         | 36                        | 10                                 | FL-GQLIDSMANSFVGTR-CONH <sub>2</sub>       |
| EGFR   | Human   | Staurosporine      | Mn     | Hepes, 7.5   | Brij         | 2.5         | 20                        | 10                                 | FL-KKAEEEEYFEYFFLVAKK-CONH <sub>2</sub>    |
| ErbB4  | Human   | Staurosporine      | Mn     | Hepes, 7.5   | Triton x-100 | 2           | 5                         | 10                                 | FITC-KKKKEAIYFFF-CONH <sub>2</sub>         |
| FAK2   | Human   | Staurosporine      | Mg     | Tricine, 8.0 | Triton x-100 | 47.9        | 5.85                      | 10                                 | FITC-KKKKEAIYFFF-CONH <sub>2</sub>         |
| FGFR1  | Human   | Staurosporine      | Mg     | MOPS, 6.5    | Triton x-100 | 506.67      | 6                         | 10                                 | FL-KKSRGDYMTMQIG-CONH <sub>2</sub>         |
| GSK3α  | Human   | Staurosporine      | Mg     | Hepes, 7.5   | Brij         | 28.5        | 0.5                       | 3                                  | FL-KRREILSRRPpSYR-COOH                     |
| IGF1R  | Human   | Staurosporine      | Mn     | Hepes, 7.5   | Brij         | 2930        | 20                        | 10                                 | FL-KKSRGDYMTMQIG-CONH <sub>2</sub>         |
| JNK2α2 | Human   | SB203580           | Mg     | Hepes, 7.5   | Brij         | 35.5        | 24                        | 3                                  | FL-KRELVEPLTPSGEAPNQALLR-CONH <sub>2</sub> |
| KDR    | Human   | Staurosporine      | Mg     | Hepes, 7.5   | CHAPSO       | 450         | 2.5                       | 10                                 | FL-EEPLYWSFPAKKK-CONH <sub>2</sub>         |
| MAPK1  | Human   | K525a              | Mg     | Hepes, 7.5   | Brij         | 14          | 1.35                      | 10                                 | FL-IPTSPITTTYFFFKKK-COOH                   |
| MAPK3  | Human   | Staurosporine      | Mg     | Hepes, 7.5   | Brij         | 21          | 1.35                      | 3                                  | FL-IPTSPITTTYFFFKKK-COOH                   |
| MAPK11 | Human   | SB203580           | Mg     | Hepes, 7.5   | Brij         | 107.33      | 7.5                       | 3                                  | FL-IPTSPITTTYFFFKKK-COOH                   |
| MAPK14 | Human   | SB203580           | Mg     | Hepes, 7.5   | Brij         | 100         | 10                        | 10                                 | FL-IPTSPITTTYFFFKKK-COOH                   |
| PDGFRb | Human   | Staurosporine      | Mn     | MOPS, 6.5    | Triton x-100 | 12          | 50                        | 10                                 | FITC-Aha-KKKKKKEIYFFF-CONH <sub>2</sub>    |
| PKA    | Human   | Staurosporine      | Mg     | Hepes, 7.5   | Brij         | 5           | 0.175                     | 3                                  | FL-LRRASLG-CONH <sub>2</sub>               |
| PKCA   | Human   | Staurosporine      | Mg     | Hepes, 7.5   | Brij         | 23          | 0.475                     | 10                                 | FL-KRPSKRAKA-COOH                          |
